# Supplementary material for: Mononuclear titanium compounds based on the silyl-linked bis(amidinate) ligand: synthesis, characterization and ethylene polymerization
Source: Royal Society of Chemistry journal article supplement (doi:10.1039/c1dt10365b), 2011-01-01
Supplement: c1dt10365b.pdf [file c1dt10365b.pdf]

## Experimental

### Synthesis and characterization

General: All manipulations and reactions were performed under a purified nitrogen atmosphere using standard Schlenk techniques on a dual manifold Schlenk line. Diethyl ether were distilled from sodium-benzophenone under nitrogen. Dichloromethane was distilled from CaH<sub>2</sub> under nitrogen. The ligand transfer reagent compound **1** was prepared according to the reported methods.<sup>1</sup> <sup>1</sup>H and <sup>13</sup>C NMR spectra were recorded with a Bruker DRX-300 spectrometer. Elemental analyses were performed with a Vario EL-III instrument. Melting points were taken with a Sanyo Gallenkamp Variable Heater.

Preparation of **1**: A solution of diamine SiMe<sub>2</sub>[NH(<sup>t</sup>Bu)]<sub>2</sub> (2.29 g, 11.34 mmol) in THF (60 cm<sup>3</sup>) at 0 °C was treated with LiBu<sup>n</sup> in hexane (2.8 mol dm<sup>-3</sup>, 8.1 cm<sup>3</sup>, 22.68 mmol). The reaction mixture was stirred at room temperature for five hours and then PhCN (2.31 cm<sup>3</sup>, 22.68 mmol) was added at 0 °C. After stirring at room temperature for five hours, the reaction solution was dried in vacuum. Compound **1** was recrystallized in hexane as colorless crystals. Yield: 1.95 g (41 %), mp 177-179 °C. <sup>1</sup>H NMR (300 MHz, C<sub>6</sub>D<sub>6</sub>): δ 7.29 (d, *J*<sub>HH</sub> = 1.8 Hz, 8H; 2,6-H of phenyls), 7.11 (m, 12H; 3,4,5-H of phenyls), 1.34 (s, 36H; CMe<sub>3</sub>), -0.13 (s, 12H; SiMe<sub>2</sub>); <sup>13</sup>C NMR (75 MHz, C<sub>6</sub>D<sub>6</sub>): δ 175.4 (N-C-N), 143.1, 127.3, 127.0 (phenyls), 51.2 (CMe<sub>3</sub>), 33.5 (CMe<sub>3</sub>), 3.2 (SiMe<sub>2</sub>); <sup>7</sup>Li NMR (117 MHz, C<sub>6</sub>D<sub>6</sub>): δ 2.27, 2.02, 1.85. Anal. Calc. for C<sub>48</sub>H<sub>68</sub>Li<sub>4</sub>N<sub>8</sub>Si<sub>2</sub>: C, 68.55; H, 8.15; N, 13.32%. Found: C, 68.57; H, 8.18; N, 13.26%.

Preparation of **2**: A solution of Li<sub>4</sub>{SiMe<sub>2</sub>[NC(Ph)N(<sup>t</sup>Bu)]<sub>2</sub>}<sub>2</sub> (1.10 g, 1.32 mmol) in Et<sub>2</sub>O (20 cm<sup>3</sup>) was cooled to -78 °C, after which TiCl<sub>4</sub>(thf)<sub>2</sub> (0.88 g, 2.64 mmol) was added. The mixture was allowed to warm to room temperature. After stirring for 12 hours, the volatiles were removed in vacuum. The residue was extracted with CH<sub>2</sub>Cl<sub>2</sub> (20 cm<sup>3</sup>) and filtered. The filtrate was concentrated to give compound **2** as red crystals. Yield: 1.11 g (80%), mp 194-195 °C. <sup>1</sup>H NMR (300 MHz, CD<sub>6</sub>Cl<sub>3</sub>): δ 7.83 – 7.14 (m, 10H; phenyls), 1.71 – 0.92 (m, 18H; <sup>t</sup>Bu), 0.41 – -0.27 (m, 6H; SiMe<sub>2</sub>); <sup>13</sup>C NMR (75 MHz, CD<sub>6</sub>Cl<sub>3</sub>): δ 173.5, 161.5 (N-C-N), 139.2 – 128.8 (phenyls), 59.5, 58.1 (CMe<sub>3</sub>), 34.4, 33.7, 32.1, 28.3 (CMe<sub>3</sub>), 8.3, 4.0 (SiMe<sub>2</sub>). Anal. Calc. for C<sub>24</sub>H<sub>34</sub>Cl<sub>2</sub>N<sub>4</sub>SiTi: C, 54.86; H, 6.52; N, 10.66%. Found: C, 54.41; H, 6.57; N, 10.24%.

Preparation of **3**: The solution of methyl lithium in Et<sub>2</sub>O (1.6 mol dm<sup>-3</sup>, 1.98 cm<sup>3</sup>, 3.16 mmol) was added into the slurry of **2** (0.83 g, 1.58 mmol) in Et<sub>2</sub>O (ca 20 cm<sup>3</sup>) by syringe at -78 °C. The mixture was allowed to warm to room temperature. After stirring for 12 hours, the volatiles were removed in vacuum. The residue was extracted with CH<sub>2</sub>Cl<sub>2</sub> (20 cm<sup>3</sup>) and filtered. The filtrate was concentrated to give compound **3** as yellow crystals. Yield: 0.38 g (50%). <sup>1</sup>H NMR (300 MHz, CD<sub>6</sub>Cl<sub>3</sub>): δ 7.38 (p, 10H; phenyls), 1.44, 1.41 (d, 18H; <sup>t</sup>Bu), 1.08 (s, 6H; TiMe<sub>2</sub>), -0.21 (s, 6H; SiMe<sub>2</sub>); <sup>13</sup>C NMR (75 MHz, CD<sub>6</sub>Cl<sub>3</sub>): δ 171.4 (N-C-N), 142.0 (*ipso*-C of phenyl), 131.0 – 129.0 (phenyls), 66.8 (TiMe<sub>2</sub>), 58.0 (CMe<sub>3</sub>), 35.2, 34.8 (CMe<sub>3</sub>), 4.5 (SiMe<sub>2</sub>). Anal. Calc. for C<sub>26</sub>H<sub>40</sub>N<sub>4</sub>SiTi: C, 64.44; H, 8.32; N, 11.56%. Found: C, 64.21; H, 8.19; N, 11.38%.

### X-ray data collection and crystal structure determination

The single crystals of **2** and **3** suitable for X-ray diffraction studies were obtained. X-Ray diffraction data were collected with graphite-monochromated Mo-K $\alpha$  radiation ( $\lambda = 0.71073$  Å) on a Bruker Smart Apex CCD diffractometer. The collected frames were processed with the proprietary software SAINT and an absorption correction was applied (SADABS) to the collected reflections.<sup>2,3</sup> The structures of these molecules were solved by direct methods and expanded by standard difference Fourier syntheses using the software SHELXTL.<sup>4</sup> Structure refinements were made on  $F^2$  using the full-matrix least-squares technique. All non-hydrogen atoms were refined with anisotropic displacement parameters. Hydrogen atoms were placed in their idealized positions and allowed to ride on the respective parent atoms.

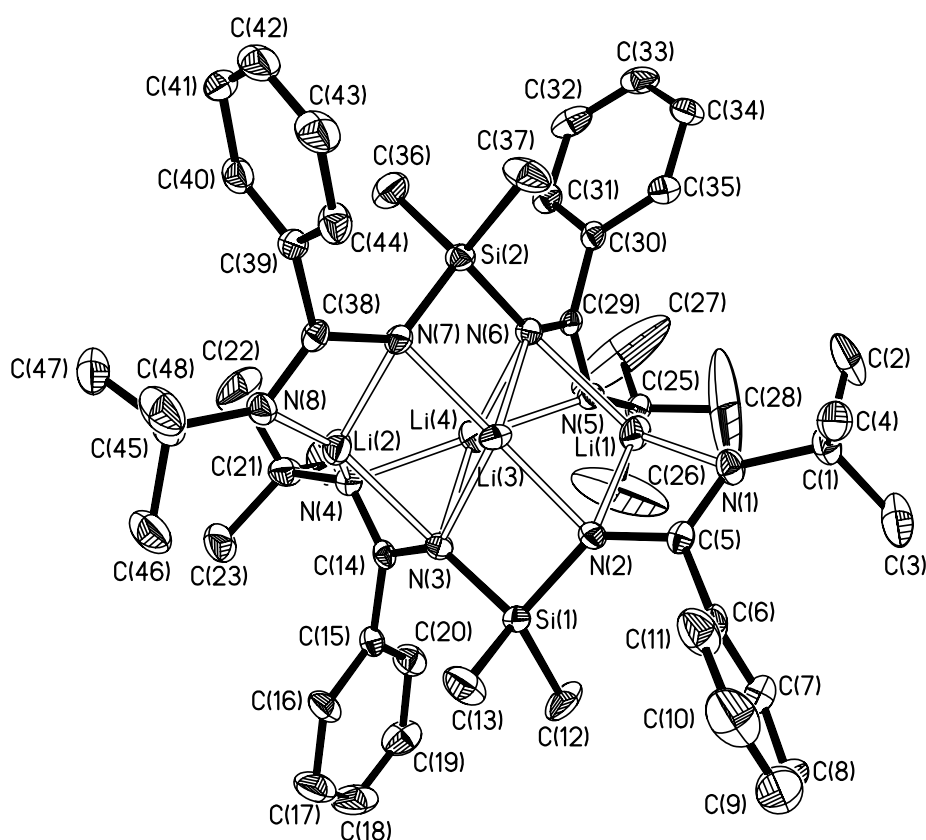

Molecular structure of compound **1**. Thermal ellipsoids are set at 30% probability and hydrogen atoms are omitted for clarity.

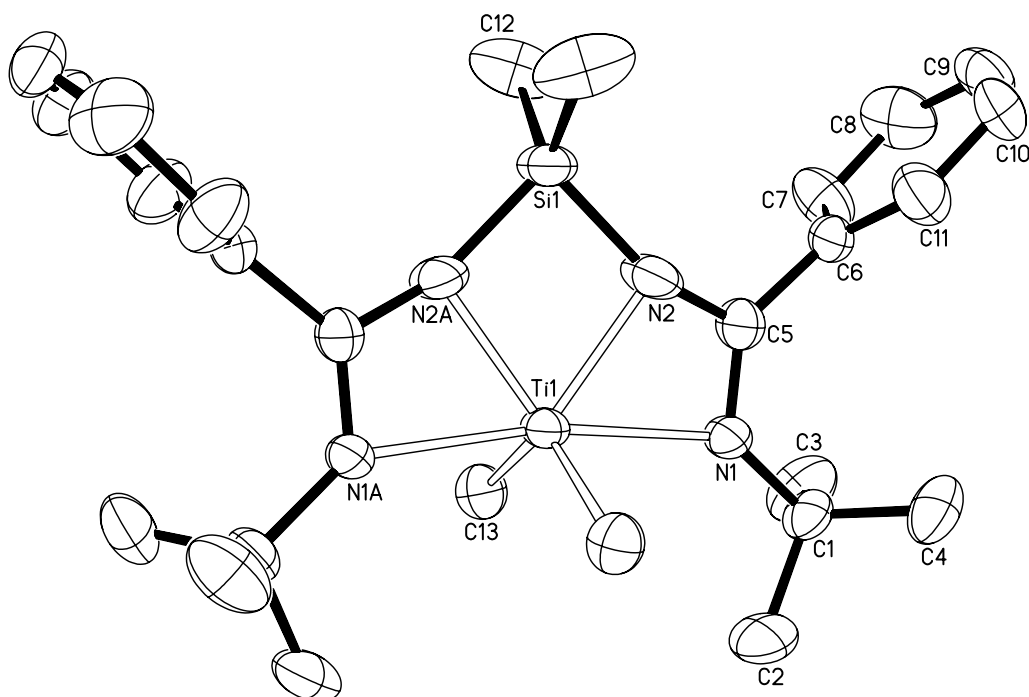

Molecular structure of compound **3**. Thermal ellipsoids are set at 30% probability and hydrogen atoms are omitted for clarity. Selected bond distances (Å) and angles (°): Ti1-N1 = 2.266(4), Ti1-N2 = 2.027(5), Ti1-C13 = 2.124(6), N1-C5 = 1.296(8), N2-C5 = 1.344(7), N2-Si1 = 1.685(5); N1-Ti1-N2 = 60.97(17), N1-Ti1-N1A = 169.6(3), N2-Ti1-N2A = 70.7(3), C13-Ti1-C13A = 125.7(4), N1-C5-N2 = 112.0(5), N2-Si1-N2A = 88.2(4).

### Ethylene polymerization

General: The polymerizations were performed in a 250 mL autoclave. Compound **2** was dissolved in toluene and transferred into autoclave with a syringe. The solution of MAO in toluene was added with a syringe for activation. While stirring, the ethylene gas was filled into the reactor. After stirring for a definite period of time, the reaction was quenched with 5% HCl/EtOH. The polymer was filtered, washed with ethanol and dried under vacuum.

**Table 1.** Ethylene polymerization by the **2**/MAO system<sup>a</sup>

| Entry | Al/Ti | <i>T</i><br>[°C] | <i>P</i><br>[atm] | Productivity <sup>b</sup> | <i>T</i> <sub>m</sub> <sup>c</sup> | <i>M</i> <sub>w</sub> <sup>d</sup> | <i>M</i> <sub>w</sub> / <i>M</i> <sub>n</sub> <sup>d</sup> |
|-------|-------|------------------|-------------------|---------------------------|------------------------------------|------------------------------------|------------------------------------------------------------|
| 1     | 2000  | 30               | 1                 | no                        |                                    |                                    |                                                            |
| 2     | 2000  | 50               | 1                 | no                        |                                    |                                    |                                                            |
| 3     | 5000  | 30               | 1                 | no                        |                                    |                                    |                                                            |
| 4     | 5000  | 50               | 1                 | trace                     |                                    |                                    |                                                            |
| 5     | 5000  | 50               | 10                | 46                        | 132.6                              |                                    |                                                            |
| 6     | 15000 | 100              | 10                | 1020                      | 133.1                              | 3.68                               | 14                                                         |

<sup>a</sup> Reaction conditions: 5 μmol catalyst, time = 30 min, toluene solvent (100 mL). <sup>b</sup> In units of kg(PE) mol<sup>-1</sup>(Ti) h<sup>-1</sup>. <sup>c</sup> Determined by DSC. <sup>d</sup> In units of 10<sup>5</sup> g mol<sup>-1</sup>; determined by GPC.

**Table 2.** Ethylene polymerization by the **3**/MAO system<sup>a</sup>

| Entry | Al/Ti | $T$<br>[°C] | $P$<br>[atm] | Productivity <sup>b</sup> | $T_m^c$ | $M_w^d$ | $M_w/M_n^d$ |
|-------|-------|-------------|--------------|---------------------------|---------|---------|-------------|
| 1     | 2000  | 30          | 1            | no                        |         |         |             |
| 2     | 2000  | 50          | 1            | trace                     |         |         |             |
| 3     | 5000  | 30          | 1            | no                        |         |         |             |
| 4     | 5000  | 50          | 1            | trace                     |         |         |             |
| 5     | 5000  | 50          | 10           | 93                        | 133.4   |         |             |
| 6     | 15000 | 80          | 10           | 1614                      | 133.9   | 1.07    | 3.6         |

<sup>a</sup> Reaction conditions: 5  $\mu$ mol catalyst, time = 30 min, toluene solvent (100 mL). <sup>b</sup> In units of kg(PE) mol<sup>-1</sup>(Ti) h<sup>-1</sup>. <sup>c</sup> Determined by DSC. <sup>d</sup> In units of 10<sup>5</sup> g mol<sup>-1</sup>; determined by GPC.

**Table 3.** Supplementary polymerization data of **2**/MAO system in 10 atm

| Entry | Al/Ti | t(min) | $T$ (°C) | Productivity(kg(PE) mol <sup>-1</sup> (Ti) h <sup>-1</sup> ) | $T_m$ (°C) |
|-------|-------|--------|----------|--------------------------------------------------------------|------------|
| 1     | 5000  | 30     | 50       | 46                                                           | 132.6      |
| 2     | 10000 | 30     | 50       | 50                                                           | 132.7      |
| 3     | 15000 | 30     | 50       | 120                                                          | 133.0      |
| 5     | 20000 | 30     | 50       | 98                                                           | 132.5      |
| 6     | 15000 | 30     | 80       | 810                                                          | 132.8      |
| 7     | 15000 | 30     | 100      | 1020                                                         | 133.1      |
| 8     | 15000 | 60     | 100      | 630                                                          | 134.1      |

Entries 1 and 7 are cited from **table 1**. Entry 7 gives the best result of **2**/MAO system. By comparing entry 7 and entry 8, it shows reaction time of 30 minutes is better than 60 minutes.

**Table 4.** Supplementary polymerization data of **3**/MAO system in 10 atm

| Entry | Al/Ti | t(min) | $T$ (°C) | Productivity(kg(PE) mol <sup>-1</sup> (Ti) h <sup>-1</sup> ) | $T_m$ (°C) |
|-------|-------|--------|----------|--------------------------------------------------------------|------------|
| 1     | 5000  | 30     | 50       | 93                                                           | 133.4      |
| 2     | 10000 | 30     | 50       | 100                                                          | 133.2      |
| 3     | 15000 | 30     | 50       | 650                                                          | 133.5      |
| 5     | 20000 | 30     | 50       | 390                                                          | 132.9      |
| 6     | 15000 | 30     | 80       | 1614                                                         | 133.9      |
| 7     | 15000 | 30     | 100      | 1200                                                         | 133.1      |
| 8     | 15000 | 60     | 80       | 870                                                          | 134.0      |

Entries 1 and 6 are cited from **table 2**. Entry 6 gives the best result of **3**/MAO system. By comparing entry 6 and entry 8, it shows reaction time of 30 minutes is better than 60 minutes.

## References

- 1 S.-D. Bai, J.-P. Guo, D.-S. Liu, *Dalton Trans.* 2006, 2244.
- 2 SAINT, Reference manual, Siemens Energy and Automation, Madison, WI, 1994–1996.
- 3 G. M. Sheldrick, SADABS, Empirical Absorption Correction Program, University of Göttingen, Germany, 1997.

- 4 G. M. Sheldrick, SHELXTLTM, Reference manual, version 5.1, Siemens, Madison, WI, 1997.
